# Supplementary material for: Selective CO2 Fixation to Styrene Oxide by Ta-Substitution of Lindqvist-Type [(Ta,Nb)6O19]8− Clusters
Source: MDPI journal article supplement (doi:10.3390/catal13020442), 2023-02-18
Supplement: s1 [file s1]

Supplementary information  
for

**Selective CO<sub>2</sub> fixation to styrene oxide by Ta-substitution of Lindqvist-type [(Ta,Nb)<sub>6</sub>O<sub>19</sub>]<sup>8-</sup> clusters**

**Vorakit Chudatemiya<sup>1</sup>, Mio Tsukada<sup>1</sup>, Hiroki Nagakari<sup>1</sup>, Soichi Kikkawa<sup>1,2</sup>, Jun Hirayama<sup>1,2</sup>, Naoki Nakatani<sup>1</sup>, Takafumi Yamamoto<sup>3</sup> and Seiji Yamazoe<sup>1,2,4,\*</sup>**

<sup>1</sup> Department of Chemistry, Graduate School of Science, Tokyo Metropolitan University, 1-1 Minami-Osawa, Hachioji, Tokyo 192-0397, Japan; chudatemiya-vorakit@ed.tmu.ac.jp (V.C.); tsukadamio.m1@gmail.com (M.T.); nagakari-hiroki@ed.tmu.ac.jp (H.N.); kikkawa@tmu.ac.jp (S.K.); j.hirayamaa@gmail.com (J.H.); naokin@tmu.ac.jp (N.N.)

<sup>2</sup> Elements Strategy Initiative for Catalysts & Batteries (ESICB), Kyoto University, 1-30 Goryo-Ohara, Nishikyo-ku, Kyoto 615-8245, Japan

<sup>3</sup> Laboratory for Materials and Structures, Tokyo Institute of Technology, 4259 Nagatsuta-cho, Midori-ku, Yokohama, Kanagawa 226-8503, Japan; yama@msl.titech.ac.jp

<sup>4</sup> Precursory Research for Embryonic Science and Technology (PRESTO), Japan Science and Technology Agency (JST), Tokyo 102-0076, Japan

\* Correspondence: yamazoe@tmu.ac.jp

**Table S1.** Composition of the synthesized TBA-Ta<sub>x</sub>Nb<sub>6-x</sub>.

|                                     | C <sup>a</sup> (%) | H <sup>a</sup> (%) | N <sup>a</sup> (%) | TBA<br>amount | H<br>amount | Ta <sup>b</sup> (%) | Nb <sup>b</sup> (%) | Ta/Nb<br>ratio |
|-------------------------------------|--------------------|--------------------|--------------------|---------------|-------------|---------------------|---------------------|----------------|
| TBA-Nb <sub>6</sub>                 | 45.29              | 9.42               | 3.43               | 6.0           | 2.0         | —                   | 27                  | —              |
| TBA-Ta <sub>1</sub> Nb <sub>5</sub> | 39.19              | 8.62               | 2.98               | 5.0           | 3.0         | 9.4                 | 24                  | 1.0/5.0        |
| TBA-Ta <sub>2</sub> Nb <sub>4</sub> | 39.86              | 8.90               | 3.01               | 5.3           | 2.7         | 17                  | 17                  | 2.0/4.0        |
| TBA-Ta <sub>3</sub> Nb <sub>3</sub> | 44.38              | 9.10               | 3.44               | 6.1           | 1.9         | 20                  | 11                  | 2.9/3.1        |
| TBA-Ta <sub>4</sub> Nb <sub>2</sub> | 37.24              | 8.50               | 2.83               | 5.3           | 2.7         | 31                  | 7.9                 | 4.0/2.0        |
| TBA-Ta <sub>5</sub> Nb <sub>1</sub> | 38.81              | 8.26               | 2.91               | 5.7           | 2.3         | 35                  | 3.2                 | 5.1/0.9        |
| TBA-Ta <sub>6</sub>                 | 37.05              | 7.75               | 2.70               | 5.7           | 2.3         | 41                  | —                   | —              |

<sup>a</sup>Determined by elemental analysis.

<sup>b</sup>Estimated by Ta L<sub>3</sub>- and Nb K-edges X-ray absorption.

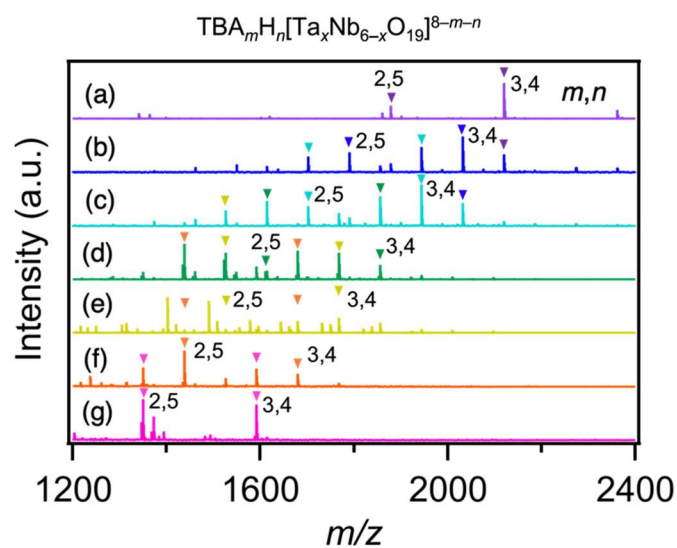

**Figure S1.** ESI-MS (negative ion mode) spectra of (a)  $\text{TBA}_m\text{H}_n[\text{Ta}_6\text{O}_{19}]^{8-m-n}$ , (b)  $\text{TBA}_m\text{H}_n[\text{Ta}_5\text{Nb}_1\text{O}_{19}]^{8-m-n}$ , (c)  $\text{TBA}_m\text{H}_n[\text{Ta}_4\text{Nb}_2\text{O}_{19}]^{8-m-n}$ , (d)  $\text{TBA}_m\text{H}_n[\text{Ta}_3\text{Nb}_3\text{O}_{19}]^{8-m-n}$ , (e)  $\text{TBA}_m\text{H}_n[\text{Ta}_2\text{Nb}_4\text{O}_{19}]^{8-m-n}$ , (f)  $\text{TBA}_m\text{H}_n[\text{Ta}_1\text{Nb}_5\text{O}_{19}]^{8-m-n}$ , and (g)  $\text{TBA}_m\text{H}_n[\text{Nb}_6\text{O}_{19}]^{8-m-n}$  measured in aqueous solutions.

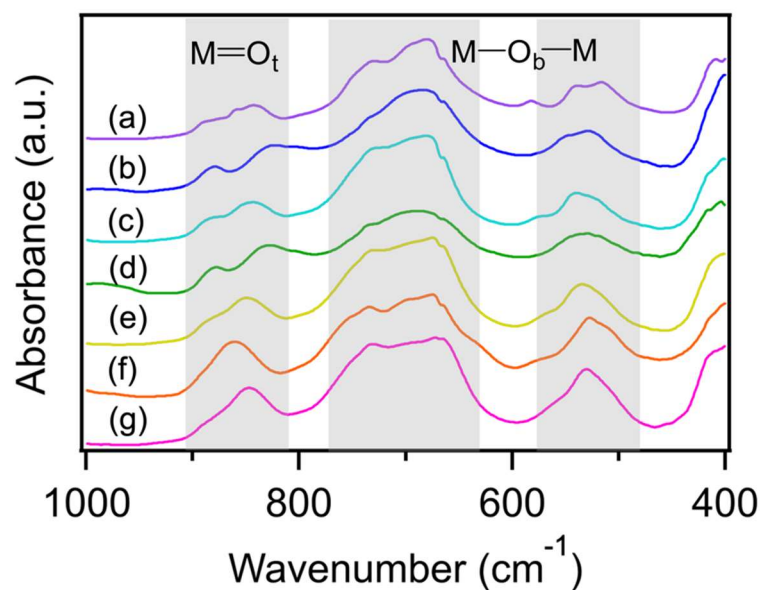

**Figure S2.** FT-IR spectra (ATR mode) of (a) TBA-Ta<sub>6</sub>, (b) TBA-Ta<sub>5</sub>Nb<sub>1</sub>, (c) TBA-Ta<sub>4</sub>Nb<sub>2</sub>, (d) TBA-Ta<sub>3</sub>Nb<sub>3</sub>, (e) TBA-Ta<sub>2</sub>Nb<sub>4</sub>, (f) TBA-Ta<sub>1</sub>Nb<sub>5</sub>, and (g) TBA-Nb<sub>6</sub>.

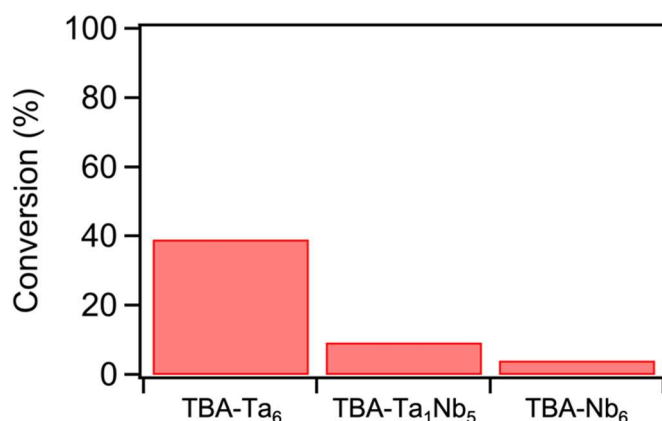

**Figure S3.** CO<sub>2</sub> fixation into **SO** promoted by TBA-Ta<sub>x</sub>Nb<sub>6-x</sub> under N<sub>2</sub> atmosphere. Bars represent conversion of **SO**. Reaction condition: catalyst loading = 5 μmol, styrene oxide = 0.6 mL (ca. 5 mmol), N<sub>2</sub> = 0.1 MPa, temperature = 100 °C, reaction time = 6 h. Yield of **SC** was not detected in all cases.

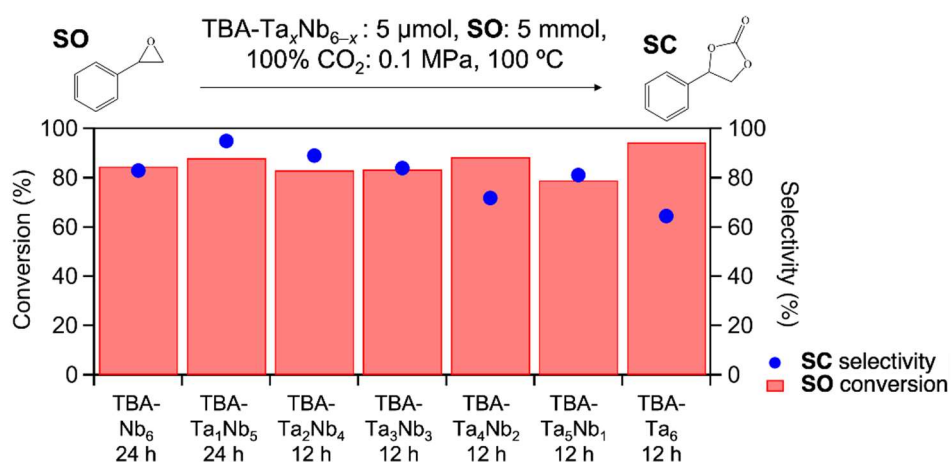

**Figure S4.** Results of CO<sub>2</sub> fixation to **SO** over TBA-Ta<sub>x</sub>Nb<sub>6-x</sub>. Bars represent conversion of **SO**, blue dots represent selectivity of **SC**. Reaction condition: catalyst loading = 5 μmol, **SO** = 0.6 mL (ca. 5 mmol), 100% CO<sub>2</sub> = 0.1 MPa, temperature = 100 °C. The reaction time was optimized to achieve >80% conversion.

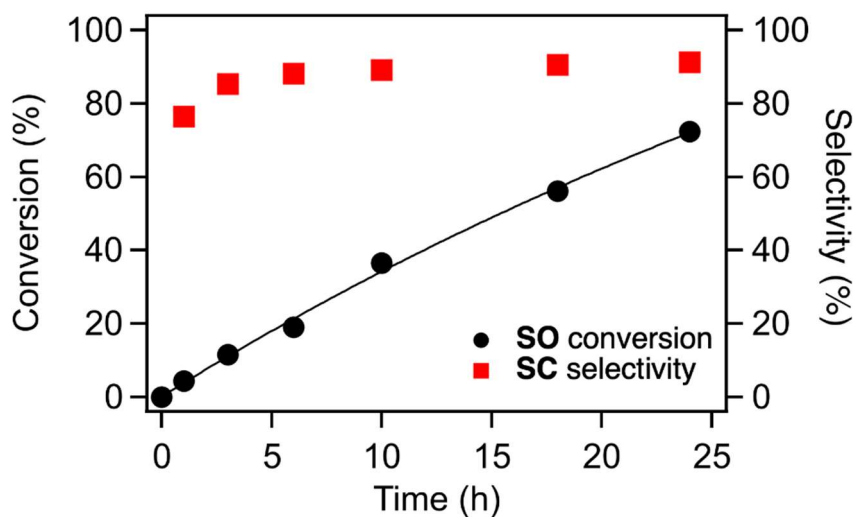

**Figure S5.** Time course of CO<sub>2</sub> fixation reaction to **SO** and selectivity of **SC** over TBA-Nb<sub>6</sub>. Reaction condition: TBA-Nb<sub>6</sub> = 10 μmol, **SO** = 1.2 mL (ca. 10 mmol), 100% CO<sub>2</sub> = 0.1 MPa, temperature = 100 °C.

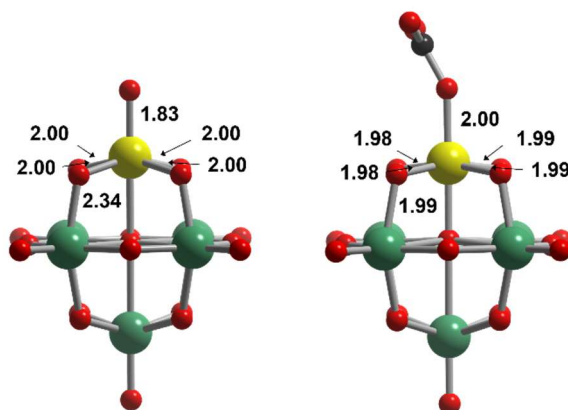

**Figure S6.** Optimized structure of [Ta<sub>1</sub>Nb<sub>5</sub>O<sub>19</sub>]<sup>8-</sup> and CO<sub>2</sub>-adsorbed [Ta<sub>1</sub>Nb<sub>5</sub>O<sub>19</sub>]<sup>8-</sup>. Color codes: yellow atom, Ta; green atom, Nb; blue line, Ta-coordinated O atoms; green line, Nb-coordinated O atoms; red, total O atoms.

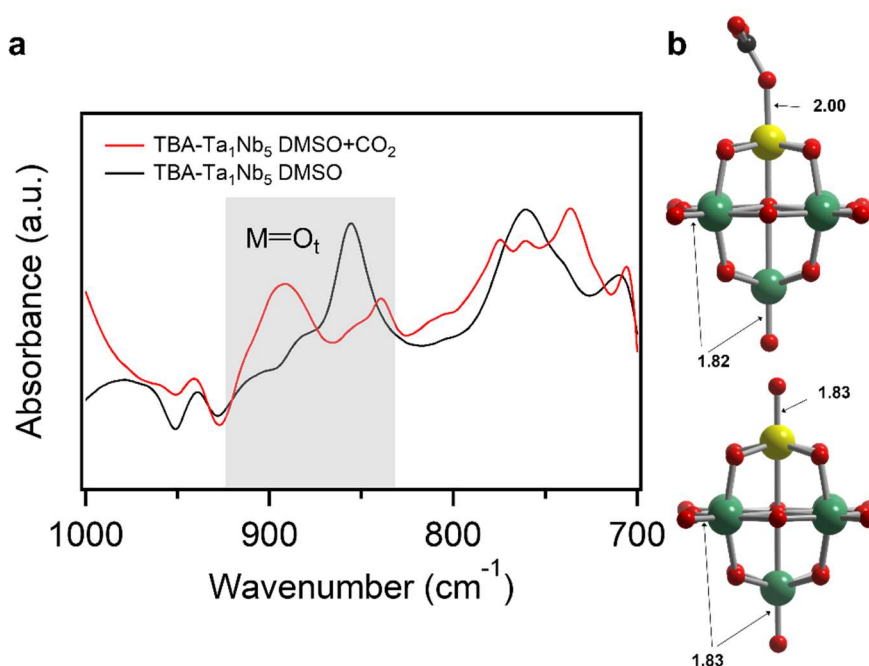

**Figure S7.** (a) *In-situ* FT-IR spectra (ATR mode) of TBA-Ta<sub>1</sub>Nb<sub>5</sub> in DMSO before (black line) and after CO<sub>2</sub> adsorption (red line). (b) Optimized structure of [Ta<sub>1</sub>Nb<sub>5</sub>O<sub>19</sub>]<sup>8-</sup> and CO<sub>2</sub>-adsorbed [Ta<sub>1</sub>Nb<sub>5</sub>O<sub>19</sub>]<sup>8-</sup>.

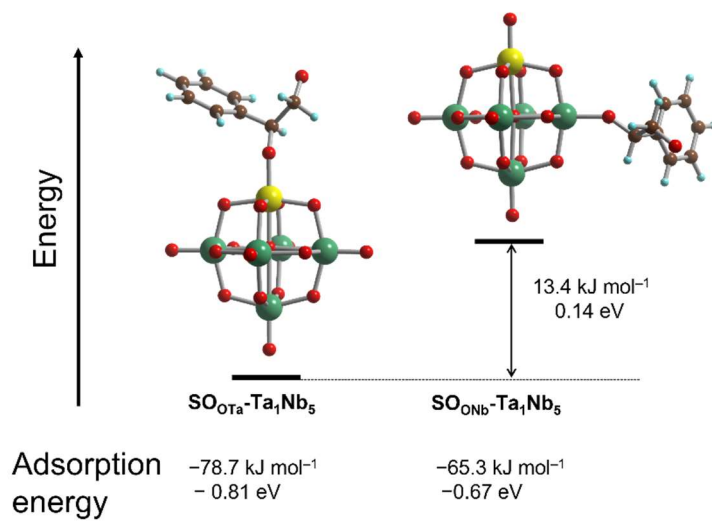

**Figure S8.** Total energy of SO-adsorbed [Ta<sub>1</sub>Nb<sub>5</sub>O<sub>19</sub>]<sup>8-</sup> at different base sites.

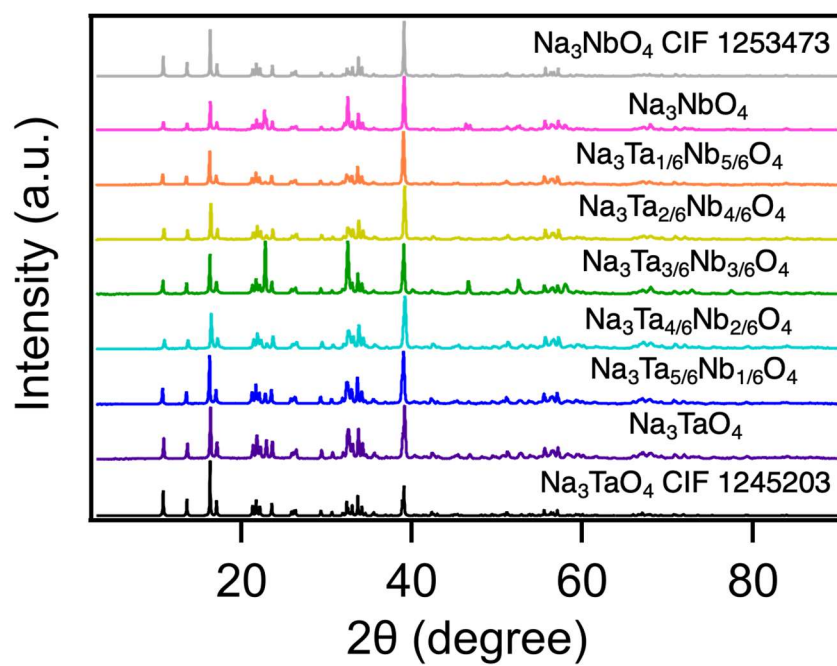

**Figure S9.** XRD patterns of  $\text{Na}_3\text{Ta}_{(6-x)/6}\text{Nb}_{x/6}\text{O}_4$ .
